# Supplementary material
Source: Springer Nature journal article supplement (https://www.springermedizin.de/resource/supplementary/12899_2009_158_MOESM2_ESM.pdf/9514562)

**A**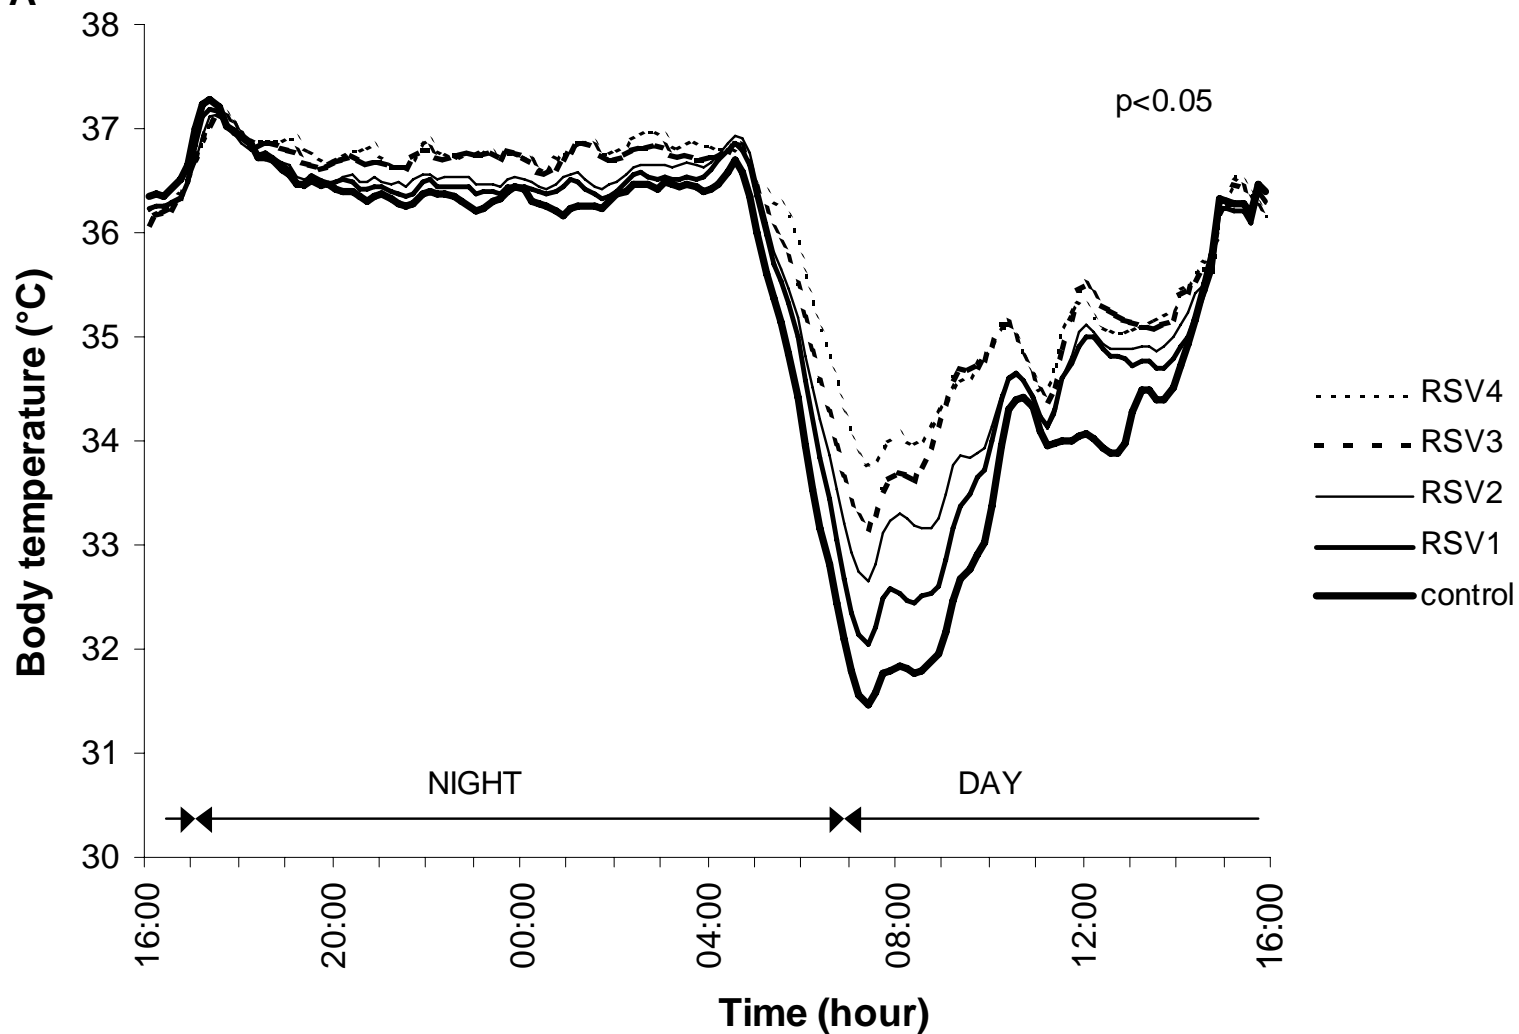**B**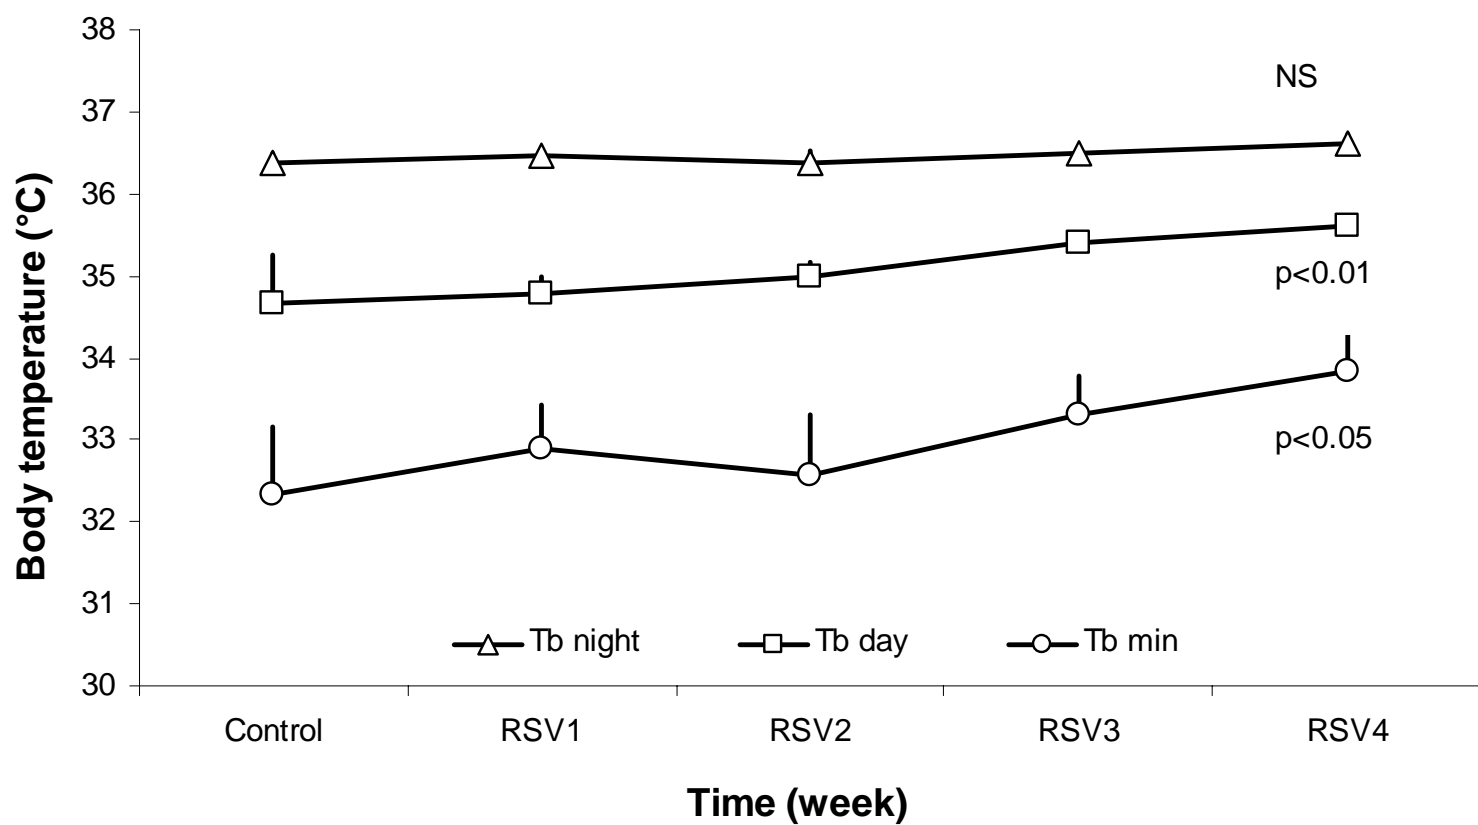

Supplement: MOESM2 [file 9514562]
